# Supplementary material
Source: publisher site journal article supplement (https://www.dovepress.com/article/578054)
Supplement: Supplementary file 1 [file 578054_Supplementary%20Material%201_1.docx]

**Supplementary Material 1**

**Pubmed（289）**

#1:353613

((((((((((((((((("Circuit-Based Exercise"[Mesh]) OR "Gymnastics"[Mesh]) OR "Exercise Therapy"[Mesh]) OR "Endurance Training"[Mesh]) OR "High-Intensity Interval Training"[Mesh]) OR "Resistance Training"[Mesh]) OR "Exercise"[Mesh]) OR "Breathing Exercises"[Mesh]) OR "Warm-Up Exercise"[Mesh]) OR "Stair Climbing"[Mesh]) OR "Plyometric Exercise"[Mesh]) OR "Muscle Stretching Exercises"[Mesh]) OR "Exergaming"[Mesh]) OR "Walking"[Mesh]) OR "Running"[Mesh]) OR "Swimming"[Mesh]) OR "Dancing"[Mesh]) OR "Yoga"[Mesh]

#2:1376576

((((((((((((((((((((((((((((((((((((((exercise[Title/Abstract]) OR (exercises[Title/Abstract])) OR (training[Title/Abstract])) OR (physical activity[Title/Abstract])) OR (physical exercise[Title/Abstract])) OR (exercise program[Title/Abstract])) OR (aerobic training[Title/Abstract])) OR (walking[Title/Abstract])) OR (ambulation[Title/Abstract])) OR (running[Title/Abstract])) OR (swimming[Title/Abstract])) OR (jogging[Title/Abstract])) OR (activities of daily living[Title/Abstract])) OR (dancing[Title/Abstract])) OR (yoga[Title/Abstract])) OR (pilates[Title/Abstract])) OR (pedometer[Title/Abstract])) OR (exergaming[Title/Abstract])) OR (gymnastics[Title/Abstract])) OR (muscle stretching exercises[Title/Abstract])) OR (circuit-based exercise[Title/Abstract])) OR (endurance training[Title/Abstract])) OR (HIIT[Title/Abstract])) OR (plyometric exercise[Title/Abstract])) OR (resistance training[Title/Abstract])) OR (stair climbing[Title/Abstract])) OR (warm-up exercise[Title/Abstract])) OR (acute exercise[Title/Abstract])) OR (pulmonary rehabilitation[Title/Abstract])) OR (respiratory rehabilitation[Title/Abstract])) OR (pulmonary therap[Title/Abstract])) OR (respiratory therap[Title/Abstract])) OR (Interval train[Title/Abstract])) OR (balance train[Title/Abstract])) OR (flexibility train[Title/Abstract])) OR (strength train[Title/Abstract])) OR (stretch train[Title/Abstract])) OR (PR[Title/Abstract])) OR (Breathing Exercises[Title/Abstract])

#3:#1 OR #2 OR:1451996

(((((((((((((((((("Circuit-Based Exercise"[Mesh]) OR "Gymnastics"[Mesh]) OR "Exercise Therapy"[Mesh]) OR "Endurance Training"[Mesh]) OR "High-Intensity Interval Training"[Mesh]) OR "Resistance Training"[Mesh]) OR "Exercise"[Mesh]) OR "Breathing Exercises"[Mesh]) OR "Warm-Up Exercise"[Mesh]) OR "Stair Climbing"[Mesh]) OR "Plyometric Exercise"[Mesh]) OR "Muscle Stretching Exercises"[Mesh]) OR "Exergaming"[Mesh]) OR "Walking"[Mesh]) OR "Running"[Mesh]) OR "Swimming"[Mesh]) OR "Dancing"[Mesh]) OR "Yoga"[Mesh]) OR (((((((((((((((((((((((((((((((((((((((exercise[Title/Abstract]) OR (exercises[Title/Abstract])) OR (training[Title/Abstract])) OR (physical activity[Title/Abstract])) OR (physical exercise[Title/Abstract])) OR (exercise program[Title/Abstract])) OR (aerobic training[Title/Abstract])) OR (walking[Title/Abstract])) OR (ambulation[Title/Abstract])) OR (running[Title/Abstract])) OR (swimming[Title/Abstract])) OR (jogging[Title/Abstract])) OR (activities of daily living[Title/Abstract])) OR (dancing[Title/Abstract])) OR (yoga[Title/Abstract])) OR (pilates[Title/Abstract])) OR (pedometer[Title/Abstract])) OR (exergaming[Title/Abstract])) OR (gymnastics[Title/Abstract])) OR (muscle stretching exercises[Title/Abstract])) OR (circuit-based exercise[Title/Abstract])) OR (endurance training[Title/Abstract])) OR (HIIT[Title/Abstract])) OR (plyometric exercise[Title/Abstract])) OR (resistance training[Title/Abstract])) OR (stair climbing[Title/Abstract])) OR (warm-up exercise[Title/Abstract])) OR (acute exercise[Title/Abstract])) OR (pulmonary rehabilitation[Title/Abstract])) OR (respiratory rehabilitation[Title/Abstract])) OR (pulmonary therap[Title/Abstract])) OR (respiratory therap[Title/Abstract])) OR (Interval train[Title/Abstract])) OR (balance train[Title/Abstract])) OR (flexibility train[Title/Abstract])) OR (strength train[Title/Abstract])) OR (stretch train[Title/Abstract])) OR (PR[Title/Abstract])) OR (Breathing Exercises[Title/Abstract]))

#4: 72430

"Pulmonary Disease, Chronic Obstructive"[Mesh]

#5: 95147

(((((((((Chronic Obstructive Lung Disease[Title/Abstract]) OR (Chronic Obstructive Pulmonary Diseases[Title/Abstract])) OR (COAD[Title/Abstract])) OR (COPD[Title/Abstract])) OR (Chronic Obstructive Airway Disease[Title/Abstract])) OR (Chronic Obstructive Pulmonary Disease[Title/Abstract])) OR (Airflow Obstruction, Chronic[Title/Abstract])) OR (Airflow Obstructions, Chronic[Title/Abstract])) OR (Chronic Airflow Obstructions[Title/Abstract])) OR (Chronic Airflow Obstruction[Title/Abstract])

#6:117091: #4 OR #5 OR

("Pulmonary Disease, Chronic Obstructive"[Mesh]) OR ((((((((((Chronic Obstructive Lung Disease[Title/Abstract]) OR (Chronic Obstructive Pulmonary Diseases[Title/Abstract])) OR (COAD[Title/Abstract])) OR (COPD[Title/Abstract])) OR (Chronic Obstructive Airway Disease[Title/Abstract])) OR (Chronic Obstructive Pulmonary Disease[Title/Abstract])) OR (Airflow Obstruction, Chronic[Title/Abstract])) OR (Airflow Obstructions, Chronic[Title/Abstract])) OR (Chronic Airflow Obstructions[Title/Abstract])) OR (Chronic Airflow Obstruction[Title/Abstract]))

#7:126980

"Anxiety"[Mesh]

#8:318464

((((((((Anxiety[Title/Abstract]) OR (Angst[Title/Abstract])) OR (Nervousness[Title/Abstract])) OR (Hypervigilance[Title/Abstract])) OR (Social Anxiety[Title/Abstract])) OR (Anxieties, Social[Title/Abstract])) OR (Anxiety, Social[Title/Abstract])) OR (Social Anxieties[Title/Abstract])) OR (Anxiousness[Title/Abstract])

#9:343897 : #7 OR #8

("Anxiety"[Mesh]) OR (((((((((Anxiety[Title/Abstract]) OR (Angst[Title/Abstract])) OR (Nervousness[Title/Abstract])) OR (Hypervigilance[Title/Abstract])) OR (Social Anxiety[Title/Abstract])) OR (Anxieties, Social[Title/Abstract])) OR (Anxiety, Social[Title/Abstract])) OR (Social Anxieties[Title/Abstract])) OR (Anxiousness[Title/Abstract]))

#10:280843

("Depression"[Mesh]) OR "Depressive Disorder"[Mesh]

#11:634867

((Depression[Title/Abstract]) OR (Depressive[Title/Abstract])) OR (Depress*[Title/Abstract])

#12:678094:#10 OR #11

(("Depression"[Mesh]) OR "Depressive Disorder"[Mesh]) OR (((Depression[Title/Abstract]) OR (Depressive[Title/Abstract])) OR (Depress*[Title/Abstract]))

#13:846602 :#9 OR #12

(("Anxiety"[Mesh]) OR (((((((((Anxiety[Title/Abstract]) OR (Angst[Title/Abstract])) OR (Nervousness[Title/Abstract])) OR (Hypervigilance[Title/Abstract])) OR (Social Anxiety[Title/Abstract])) OR (Anxieties, Social[Title/Abstract])) OR (Anxiety, Social[Title/Abstract])) OR (Social Anxieties[Title/Abstract])) OR (Anxiousness[Title/Abstract]))) OR ((("Depression"[Mesh]) OR "Depressive Disorder"[Mesh]) OR (((Depression[Title/Abstract]) OR (Depressive[Title/Abstract])) OR (Depress*[Title/Abstract])))

#14:289 : #3AND #6 AND #13

((((((((((((((((((((("Circuit-Based Exercise"[Mesh]) OR "Gymnastics"[Mesh]) OR "Exercise Therapy"[Mesh]) OR "Endurance Training"[Mesh]) OR "High-Intensity Interval Training"[Mesh]) OR "Resistance Training"[Mesh]) OR "Exercise"[Mesh]) OR "Breathing Exercises"[Mesh]) OR "Warm-Up Exercise"[Mesh]) OR "Stair Climbing"[Mesh]) OR "Plyometric Exercise"[Mesh]) OR "Muscle Stretching Exercises"[Mesh]) OR "Exergaming"[Mesh]) OR "Walking"[Mesh]) OR "Running"[Mesh]) OR "Swimming"[Mesh]) OR "Dancing"[Mesh]) OR "Yoga"[Mesh]) OR (((((((((((((((((((((((((((((((((((((((exercise[Title/Abstract]) OR (exercises[Title/Abstract])) OR (training[Title/Abstract])) OR (physical activity[Title/Abstract])) OR (physical exercise[Title/Abstract])) OR (exercise program[Title/Abstract])) OR (aerobic training[Title/Abstract])) OR (walking[Title/Abstract])) OR (ambulation[Title/Abstract])) OR (running[Title/Abstract])) OR (swimming[Title/Abstract])) OR (jogging[Title/Abstract])) OR (activities of daily living[Title/Abstract])) OR (dancing[Title/Abstract])) OR (yoga[Title/Abstract])) OR (pilates[Title/Abstract])) OR (pedometer[Title/Abstract])) OR (exergaming[Title/Abstract])) OR (gymnastics[Title/Abstract])) OR (muscle stretching exercises[Title/Abstract])) OR (circuit-based exercise[Title/Abstract])) OR (endurance training[Title/Abstract])) OR (HIIT[Title/Abstract])) OR (plyometric exercise[Title/Abstract])) OR (resistance training[Title/Abstract])) OR (stair climbing[Title/Abstract])) OR (warm-up exercise[Title/Abstract])) OR (acute exercise[Title/Abstract])) OR (pulmonary rehabilitation[Title/Abstract])) OR (respiratory rehabilitation[Title/Abstract])) OR (pulmonary therap[Title/Abstract])) OR (respiratory therap[Title/Abstract])) OR (Interval train[Title/Abstract])) OR (balance train[Title/Abstract])) OR (flexibility train[Title/Abstract])) OR (strength train[Title/Abstract])) OR (stretch train[Title/Abstract])) OR (PR[Title/Abstract])) OR (Breathing Exercises[Title/Abstract]))) AND (("Pulmonary Disease, Chronic Obstructive"[Mesh]) OR ((((((((((Chronic Obstructive Lung Disease[Title/Abstract]) OR (Chronic Obstructive Pulmonary Diseases[Title/Abstract])) OR (COAD[Title/Abstract])) OR (COPD[Title/Abstract])) OR (Chronic Obstructive Airway Disease[Title/Abstract])) OR (Chronic Obstructive Pulmonary Disease[Title/Abstract])) OR (Airflow Obstruction, Chronic[Title/Abstract])) OR (Airflow Obstructions, Chronic[Title/Abstract])) OR (Chronic Airflow Obstructions[Title/Abstract])) OR (Chronic Airflow Obstruction[Title/Abstract])))) AND ((("Anxiety"[Mesh]) OR (((((((((Anxiety[Title/Abstract]) OR (Angst[Title/Abstract])) OR (Nervousness[Title/Abstract])) OR (Hypervigilance[Title/Abstract])) OR (Social Anxiety[Title/Abstract])) OR (Anxieties, Social[Title/Abstract])) OR (Anxiety, Social[Title/Abstract])) OR (Social Anxieties[Title/Abstract])) OR (Anxiousness[Title/Abstract]))) OR ((("Depression"[Mesh]) OR "Depressive Disorder"[Mesh]) OR (((Depression[Title/Abstract]) OR (Depressive[Title/Abstract])) OR (Depress*[Title/Abstract]))))) AND ((((random[Title/Abstract]) OR (randomized[Title/Abstract])) OR (randomised[Title/Abstract])) OR (RCT[Title/Abstract]))

**Web of Science（629）**

1: TS=(“exercise” OR “exercises” OR “training” OR “physical activity” OR “physical exercise” OR “exercise program” OR “aerobic training” OR “walking” OR “ambulation” OR “running” OR “swimming” OR “jogging” OR “activities of daily living” OR “dancing” OR “yoga” OR “pilates” OR “pedometer” OR “exergaming” OR “gymnastics” OR “muscle stretching exercises” OR “circuit-based exercise” OR “endurance training” OR “pulmonary rehabilitation” OR “HIIT” OR “plyometric exercise” OR “resistance training” OR “stair climbing” OR “warm-up exercise” OR “acute exercise” OR “respiratory rehabilitation” OR “pulmonary therap” OR “respiratory therap” OR “Interval train” OR “balance train” OR “flexibility train” OR “strength train” OR “stretch train” OR “PR” OR “Breathing Exercises”) and Preprint Citation Index (Exclude – Database)

Results: 5963319

2: TS=(“COPD” OR “Chronic Obstructive Lung Disease” OR “Chronic Obstructive Pulmonary Diseases” OR “Chronic Obstructive Airway Disease” OR “Chronic Obstructive Pulmonary Disease” OR “COAD” OR “Airflow Obstruction, Chronic” OR “Airflow Obstructions, Chronic” OR “Chronic Airflow Obstructions” OR “Chronic Airflow Obstruction” OR “Pulmonary Disease, Chronic Obstructive”) and Preprint Citation Index (Exclude – Database) Results: 196458

3: TS=(“Anxiety” OR “Angst” OR “Nervousness” OR “Hypervigilance” OR “Social Anxiety” OR “Anxieties, Social” OR “Anxiety, Social” OR “Social Anxieties” OR “Anxiousness” ) and Preprint Citation Index (Exclude – Database) Results: 747141

4: TS=(“Depression” OR “Depressive Disorder” OR “Depressive” OR Depress*) and Preprint Citation Index (Exclude – Database) Results: 1628704

5: #3 OR #4 and Preprint Citation Index (Exclude – Database) Results: 2003540

6: TS=(“random” OR “randomized” OR “randomised” OR “RCT”) and Preprint Citation Index (Exclude – Database) Results: 3329723

7: #1 AND #2 AND #5 AND #6 and Preprint Citation Index (Exclude–Database)Results: 629

**Cochrane（480）**

#1 MeSH descriptor: [Circuit-Based Exercise] explode all trees 74

#2 MeSH descriptor: [Gymnastics] explode all trees 117

#3 MeSH descriptor: [Exercise Therapy] explode all trees 22846

#4 MeSH descriptor: [Endurance Training] explode all trees 215

#5 MeSH descriptor: [Exercise] explode all trees 40107

#6 MeSH descriptor: [Breathing Exercises] explode all trees 1434

#7 MeSH descriptor: [Warm-Up Exercise] explode all trees 255

#8 MeSH descriptor: [Stair Climbing] explode all trees 45

#9 MeSH descriptor: [Plyometric Exercise] explode all trees 366

#10 MeSH descriptor: [Muscle Stretching Exercises] explode all trees 921

#11 MeSH descriptor: [Exergaming] explode all trees 75

#12 MeSH descriptor: [Walking] explode all trees 8443

#13 MeSH descriptor: [Running] explode all trees 2924

#14 MeSH descriptor: [Swimming] explode all trees 661

#15 MeSH descriptor: [Dancing] explode all trees 302

#16 MeSH descriptor: [Yoga] explode all trees 1244

#17 MeSH descriptor: [High-Intensity Interval Training] explode all trees 1250

#18 MeSH descriptor: [Resistance Training] explode all trees 5994

#19 #1 OR #2 OR #3 OR #4 OR #5 OR #6 OR #7 OR #8 OR #9 OR #10 OR #11 OR #12 OR #13 OR #14 OR #15 OR #16 OR #17 OR #18 54783

#20 (“exercise” OR “exercises” OR “training” OR “physical activity” OR “physical exercise” OR “exercise program” OR “aerobic training” OR “walking” OR “ambulation” OR “running” OR “swimming” OR “jogging” OR “activities of daily living” OR “dancing” OR “yoga” OR “pilates” OR “pedometer” OR “exergaming” OR “gymnastics” OR “muscle stretching exercises” OR “circuit-based exercise” OR “endurance training” OR “pulmonary rehabilitation” OR “HIIT” OR “plyometric exercise” OR “resistance training” OR “stair climbing” OR “warm-up exercise” OR “acute exercise” OR “respiratory rehabilitation” OR “pulmonary therap” OR “respiratory therap” OR “Interval train” OR “balance train” OR “flexibility train” OR “strength train” OR “stretch train” OR “PR” OR “Breathing Exercises”):ti,ab,kw (Word variations have been searched) 356685

#21 #19 OR #20 357331

#22 MeSH descriptor: [Pulmonary Disease, Chronic Obstructive] explode all trees 8079

#23 (“COPD” OR “Chronic Obstructive Pulmonary Disease” OR “Chronic Obstructive Pulmonary Diseases” OR “Chronic Airflow Obstructions” OR “Airflow Obstructions, Chronic” OR “Airflow Obstruction, Chronic” OR “Chronic Airflow Obstruction” OR “COAD” OR “Chronic Obstructive Airway Disease” OR “Chronic Obstructive Lung Disease”):ti,ab,kw (Word variations have been searched) 24947

#24 #22 OR #23 25734

#25 MeSH descriptor: [Anxiety] explode all trees 13365

#26 (“Anxiety” OR “Angst” OR “Nervousness” OR “Hypervigilance” OR “Social Anxiety” OR “Anxieties, Social” OR “Anxiety, Social” OR “Social Anxieties” OR “Anxiousness”):ti,ab,kw (Word variations have been searched) 119536

#27 #25 OR #26 119792

#28 MeSH descriptor: [Depression] explode all trees 19217

#29 MeSH descriptor: [Depressive Disorder] explode all trees 17037

#30 #28 OR #29 31191

#31 (“Depression” OR “Depressive” OR Depress*):ti,ab,kw (Word variations have been searched) 125576

#32 #30 OR #31 125655

#33 (“random” OR “randomized” OR “randomised” OR “RCT”):ti,ab,kw (Word variations have been searched) 　　1403882

#34 #21 AND #24 AND #27 AND #32 AND #33 　488（８reviews，480trials）

**Embase (717)**

#15. #3 AND #6 AND #13 AND #14 717

#14. 'random':ab,ti OR 'randomized':ab,ti OR 'randomised':ab,ti OR 'rct':ab,ti 1,945,256

#13. #9 OR #12 1,372,053

#12. #10 OR #11 1,118,881

#11. 'depression':ab,ti OR 'depressive':ab,ti OR depress*:ab,ti 870,299

#10. 'depression'/exp 765,830

#9. #7 OR #8 552,161

#8. 'anxiety':ab,ti OR 'angst':ab,ti OR 'nervousness':ab,ti OR 'hypervigilance':ab,ti OR 'social anxiety':ab,ti OR 'anxieties, social':ab,ti OR 'anxiety, social':ab,ti OR 'social anxieties':ab,ti OR 'anxiousness':ab,ti 450,603

#7. 'anxiety'/exp 372,205

#6. #4 OR #5 239,530

#5. 'copd':ab,ti OR 'chronic obstructive lung disease':ab,ti OR 'chronic obstructive pulmonary diseases':ab,ti OR 'chronic obstructive airway disease':ab,ti OR 'chronic obstructive pulmonary disease':ab,ti OR 'coad':ab,ti OR 'airflow obstruction, chronic':ab,ti OR 'airflow obstructions, chronic':ab,ti OR 'chronic airflow obstructions':ab,ti OR 'chronic airflow obstruction':ab,ti OR 'pulmonary disease, chronic obstructive':ab,ti 167,943

#4. 'chronic obstructive lung disease'/exp 210,141

#3. #1 OR #2 2,112,675

#2. 'exercise':ab,ti OR 'exercises':ab,ti OR 'training':ab,ti OR 'physical activity':ab,ti OR 'physical exercise':ab,ti OR 'exercise program':ab,ti OR 'aerobic training':ab,ti OR 'walking':ab,ti OR 'ambulation':ab,ti OR 'running':ab,ti OR 'swimming':ab,ti OR 'jogging':ab,ti OR 'activities of daily living':ab,ti OR 'dancing':ab,ti OR 'yoga':ab,ti OR 'pilates':ab,ti OR 'pedometer':ab,ti OR 'exergaming':ab,ti OR 'gymnastics':ab,ti OR 'muscle stretching exercises':ab,ti OR 'circuit-based exercise':ab,ti OR 'endurance training':ab,ti OR 'pulmonary rehabilitation':ab,ti OR 'hiit':ab,ti OR 'plyometric exercise':ab,ti OR 'resistance training':ab,ti OR 'stair climbing':ab,ti OR 'warm-up exercise':ab,ti OR 'acute exercise':ab,ti OR 'respiratory rehabilitation':ab,ti OR 'pulmonary therap':ab,ti OR 'respiratory therap':ab,ti OR 'interval train':ab,ti OR 'balance train':ab,ti OR 'flexibility train':ab,ti OR 'strength train':ab,ti OR 'stretch train':ab,ti OR 'pr':ab,ti OR 'breathing exercises':ab,ti 1,902,588

#1. 'circuit training'/exp OR 'gymnastics'/exp OR 'kinesiotherapy'/exp OR 'endurance training'/exp OR 'exercise'/exp OR 'breathing exercise'/exp OR 'warm up'/exp OR 'stair climbing'/exp OR 'plyometrics'/exp OR 'stretching exercise'/exp OR 'exergaming'/exp OR 'walking'/exp OR 'running'/exp OR 'swimming'/exp OR 'dancing'/exp OR 'yoga'/exp OR 'high intensity interval training'/exp OR 'resistance training'/exp 785,778
